# Supplementary material for: Impact of a Very Low-Calorie Ketogenic Diet (VLCKD) on Changes in Handgrip Strength in Women with Obesity
Source: MDPI journal article supplement (doi:10.3390/nu14194213), 2022-10-10
Supplement: s1 [file s1]

**TABLE S1. EXAMPLE OF VLCKD DIET THERAPY WITH MEAL  
REPLACEMENT**

**(New Penta Srl, Cuneo, Italy)**

**Breakfast (meal replacement, cappuccino drink)\***

| AVERAGE NUTRITIONAL ANALYSIS              |          |
|-------------------------------------------|----------|
| Kcal/KJ                                   | 91 / 386 |
| Fat (g)                                   | 0,5      |
| <i>of which saturated fatty acids (g)</i> | 0,4      |
| Carbohydrates (g)                         | 2,7      |
| <i>of which sugars (g)</i>                | 1,7      |
| Fiber (g)                                 | 1,7      |
| Protein (g)                               | 18       |
| Salt (g)                                  | 0,33     |

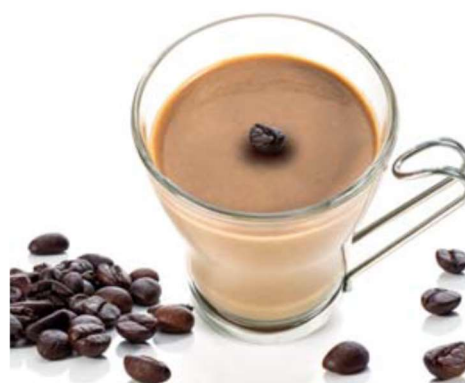

**Mid-morning snack (meal replacement, milkshake-flavored drinks)\***

| AVERAGE NUTRITIONAL ANALYSIS              |          |
|-------------------------------------------|----------|
| Kcal/KJ                                   | 88 / 371 |
| Fat (g)                                   | 0,7      |
| <i>of which saturated fatty acids (g)</i> | 0,2      |
| Carbohydrates (g)                         | 1,4      |
| <i>of which sugars (g)</i>                | 1,1      |
| Fiber (g)                                 | 2,5      |
| Protein (g)                               | 18       |
| Salt (g)                                  | 0,32     |

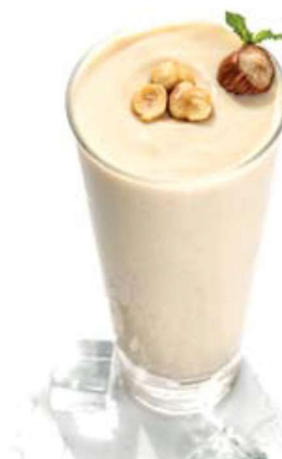

### Lunch, meal replacement (protein pasta)\*

| AVERAGE NUTRITIONAL ANALYSIS              |           |
|-------------------------------------------|-----------|
| Kcal/KJ                                   | 143 / 605 |
| Fat (g)                                   | 1,3       |
| <i>of which saturated fatty acids (g)</i> | 0,9       |
| Carbohydrates (g)                         | 1,6       |
| <i>of which sugars (g)</i>                | 1,2       |
| Fiber (g)                                 | 3,2       |
| Protein (g)                               | 15        |
| Salt (g)                                  | 0,27      |

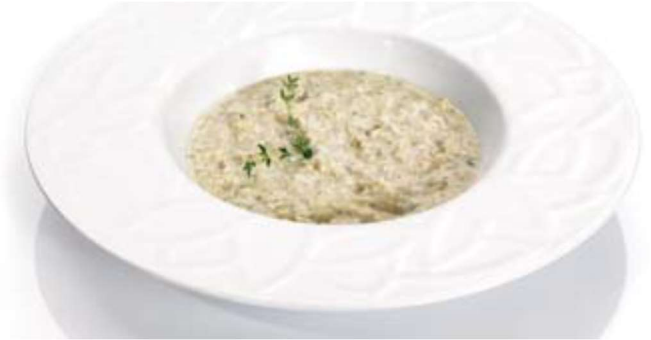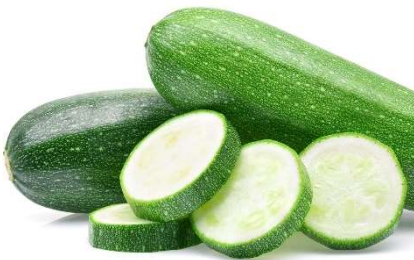

+ 200 g of low glycaemic index vegetables (e.g. courgettes)

+ 15 g of extra virgin olive oil

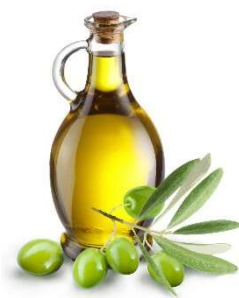

### Dinner, meal replacement (type omelette)\*

| AVERAGE NUTRITIONAL ANALYSIS              |           |
|-------------------------------------------|-----------|
| Kcal/KJ                                   | 113 / 476 |
| Fat (g)                                   | 2,6       |
| <i>of which saturated fatty acids (g)</i> | 0,1       |
| Carbohydrates (g)                         | 2,5       |
| <i>of which sugars (g)</i>                | 0,5       |
| Fiber (g)                                 | 0,5       |
| Protein (g)                               | 20        |
| Salt (g)                                  | 1,4       |

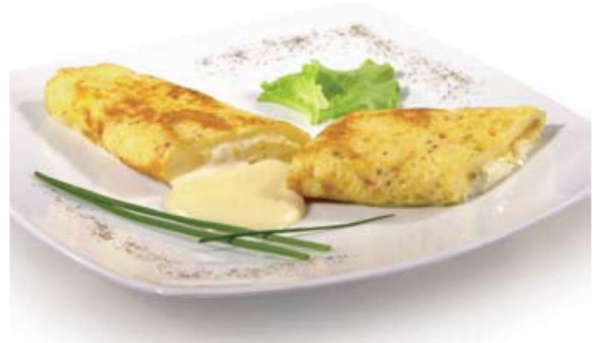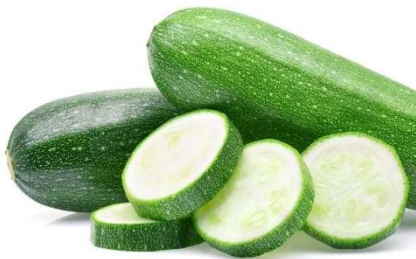

+ 200 g of low glycaemic index vegetables (e.g. courgettes)

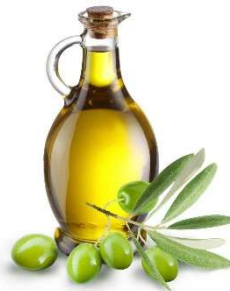

+ 15 g of extra virgin olive oil

**In addition:**

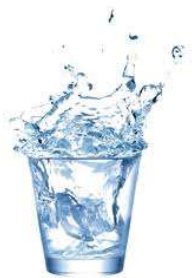

+ Drink at least 2.5 liters of water *per day*

+ Multi-vitamin and saline supplements to maintain physiological ac-id/base balance (PentaCal, New Penta, Srl., Cuneo, Italy) (B complex vitamins, C and E vitamins, minerals, including potassium, sodium, magnesium, calcium, and omega-3 fatty acids.

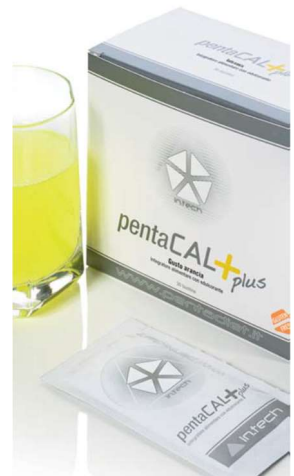

| <b>Calories and nutrients from meal replacements</b> |          |
|------------------------------------------------------|----------|
| Kcal/KJ                                              | 435/1838 |
| Fat (g)                                              | 5,1      |
| <i>of which saturated fatty acids (g)</i>            | 1,6      |
| Carbohydrates (g)                                    | 8,2      |
| <i>of which sugars (g)</i>                           | 4,5      |
| Fiber (g)                                            | 7,9      |
| Protein (g)                                          | 71       |
| Salt (g)                                             | 2,32     |

| <b>Calories and nutrients from EVOO and vegetables</b> |                |                                                 |
|--------------------------------------------------------|----------------|-------------------------------------------------|
|                                                        | EVOO<br>(30 g) | Vegetables (e.g. courgettes)<br>(200 g + 200 g) |
| Kcal/KJ                                                | 269,7/1108,8   | 44/192                                          |
| Fat (g)                                                | 29,97          | 0,4                                             |
| <i>of which saturated fatty acids (g)</i>              | 0              | 0                                               |
| Carbohydrates (g)                                      | 0              | 5,6                                             |
| <i>of which sugars (g)</i>                             | 0              | 0                                               |
| Fiber (g)                                              | 0              | 5,2                                             |
| Protein (g)                                            | 0              | 5,2                                             |
| Salt (g)                                               | 0              | 4                                               |

| <b>Average values of the VLCKD</b>        |              |
|-------------------------------------------|--------------|
| Kcal/KJ                                   | 748,7/3138,8 |
| Fat (g)                                   | 35,47        |
| <i>of which saturated fatty acids (g)</i> | 1,6          |
| Carbohydrates (g)                         | 13,8         |
| <i>of which sugars (g)</i>                | 4,5          |
| Fiber (g)                                 | 7,9          |
| Protein (g)                               | 76,2         |
| Salt (g)                                  | 6,32         |

**\* <https://pentadiet.it/prodotti>**
